# Supplementary material
Source: HighWire-hosted journal article supplement (https://gut.bmj.com/content/72/10/1838)

### Supplementary figure 1

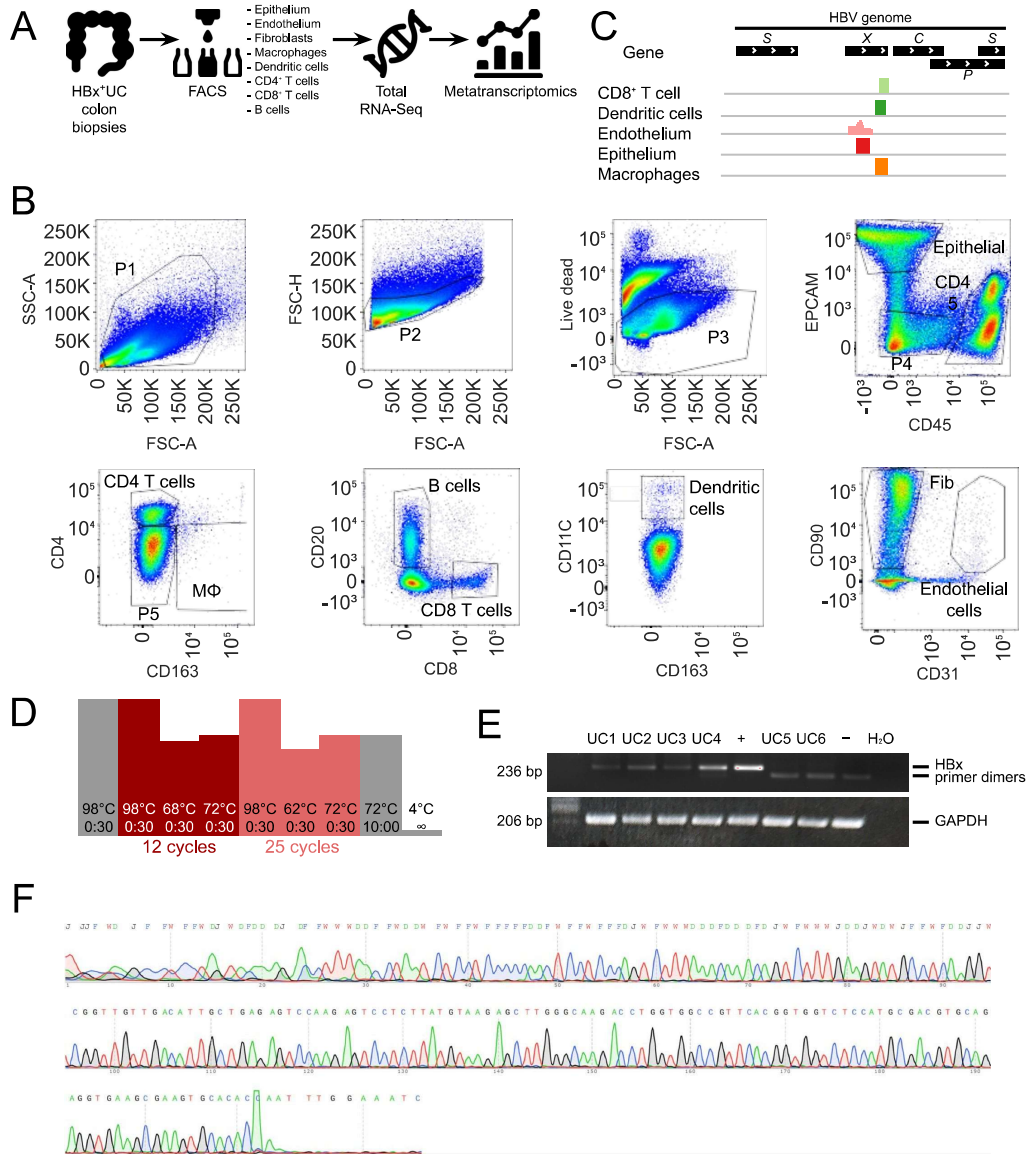

# Supplementary figure 2

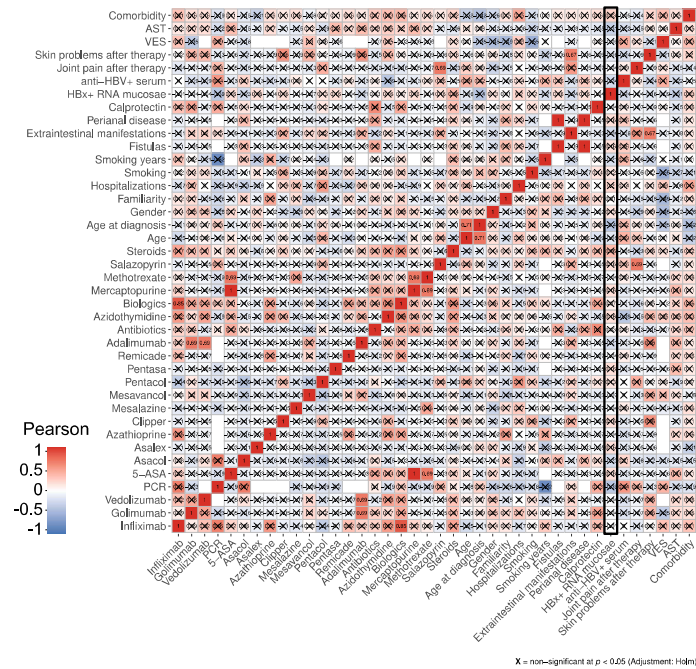

## Supplementary figure 3

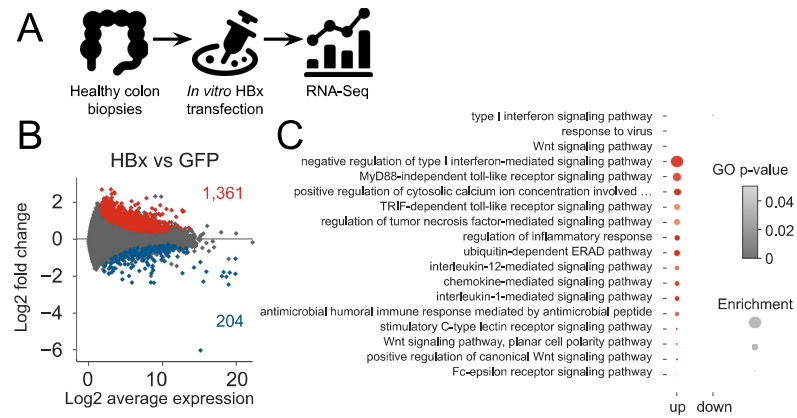

## Supplementary figure 4

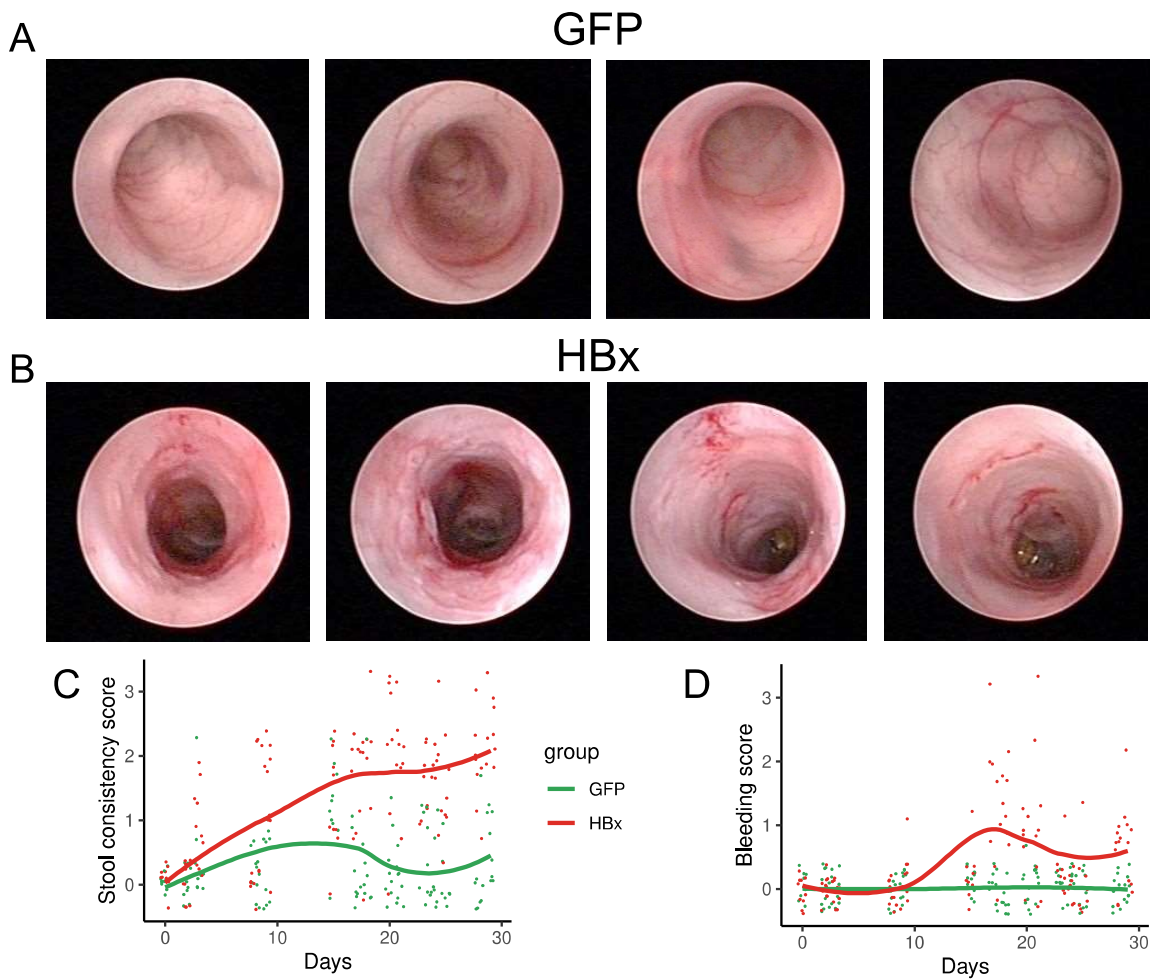

## Supplementary figure 5

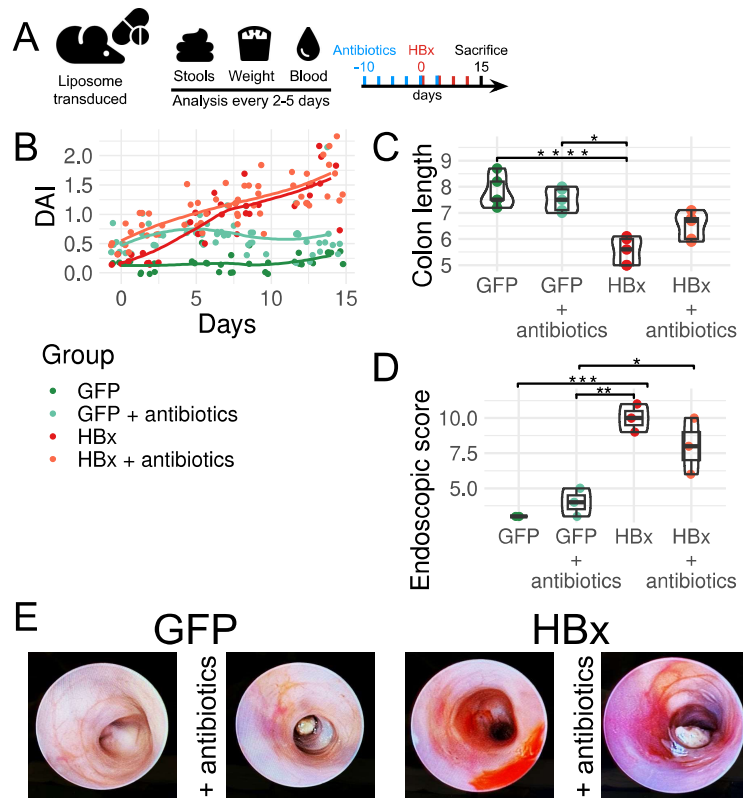

## Supplementary figure 6

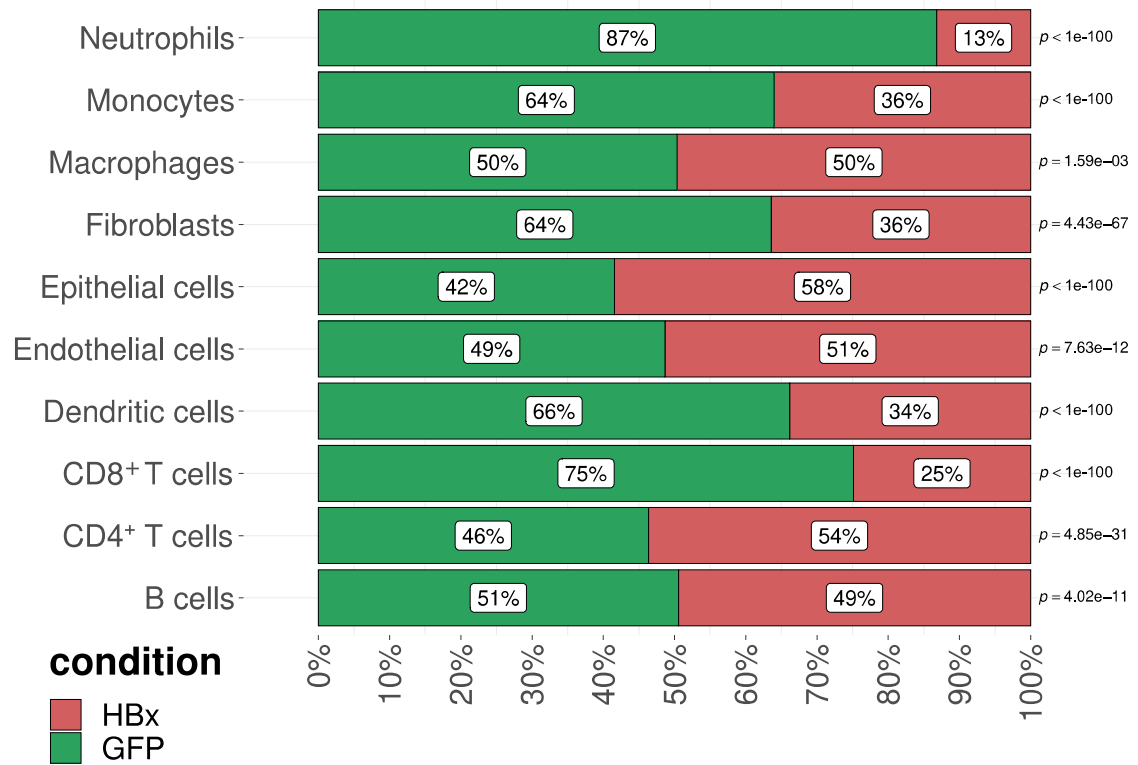

## Supplementary figure 7

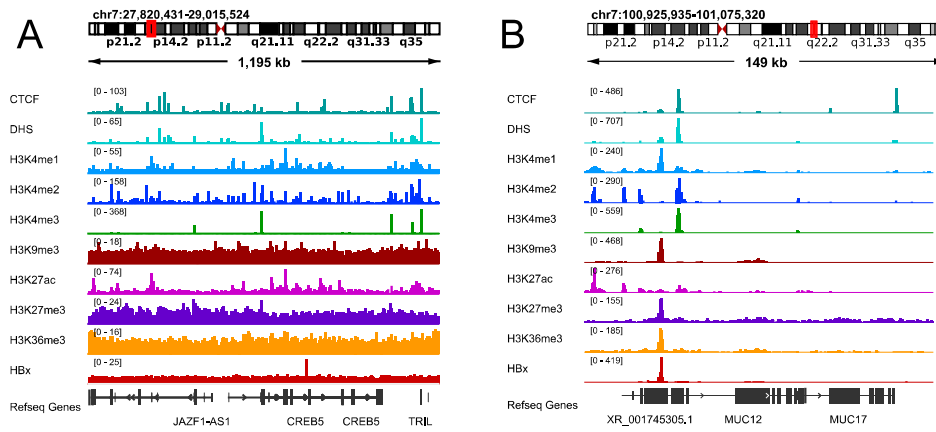

## Supplementary figure 8

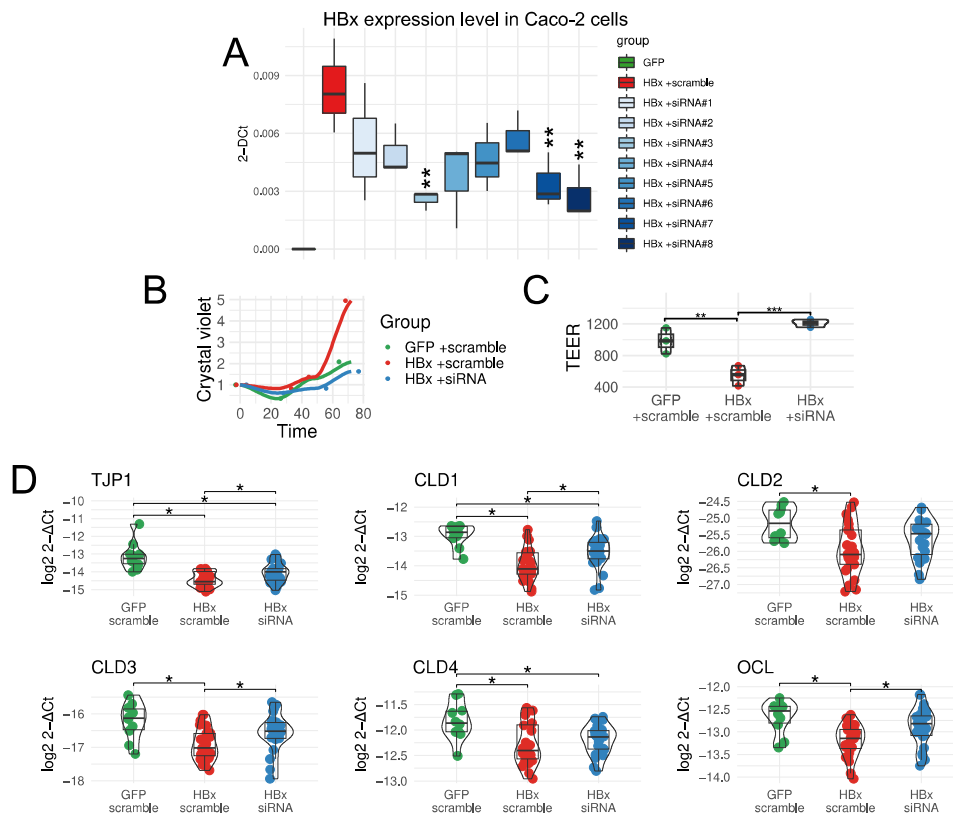



## Supplementary figure 9

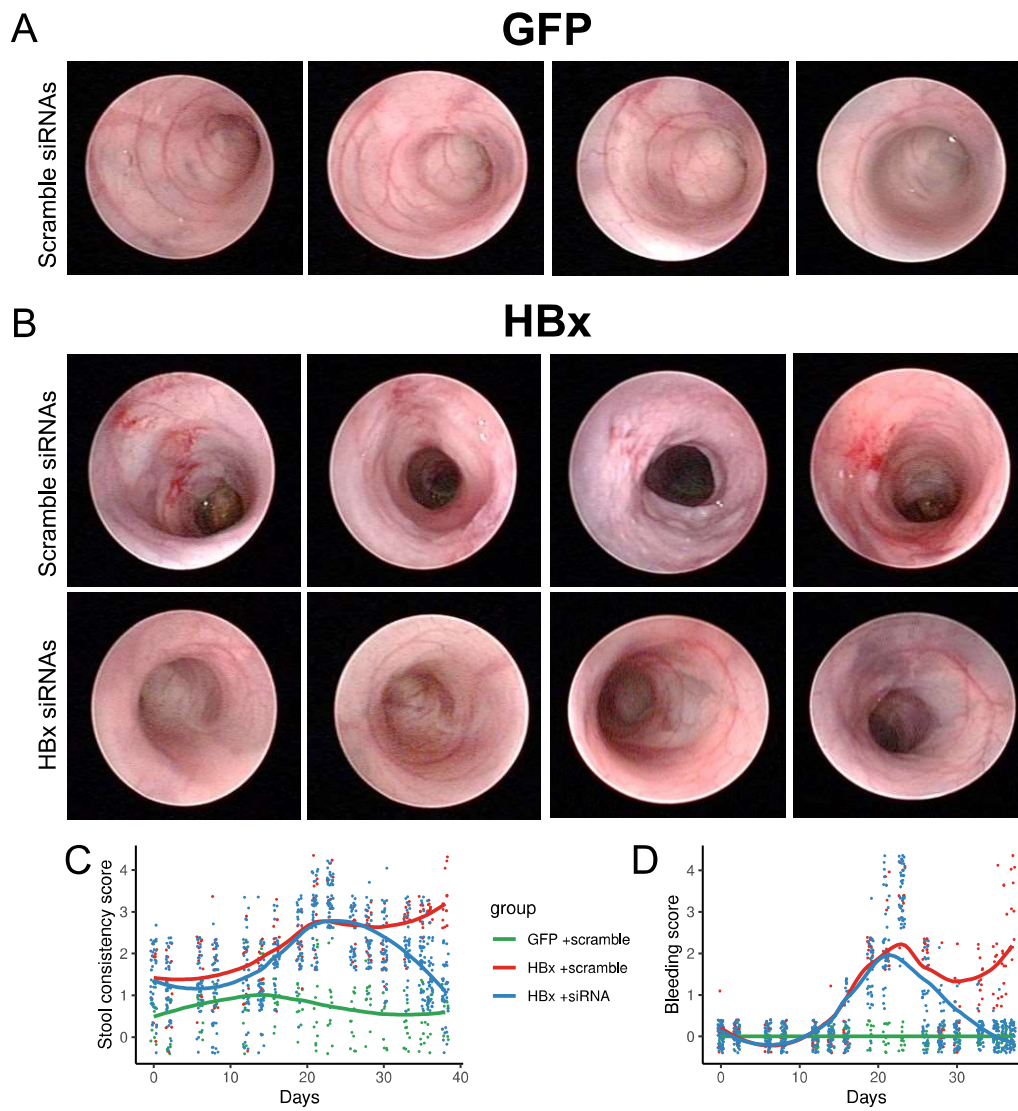

## Supplementary figure 10

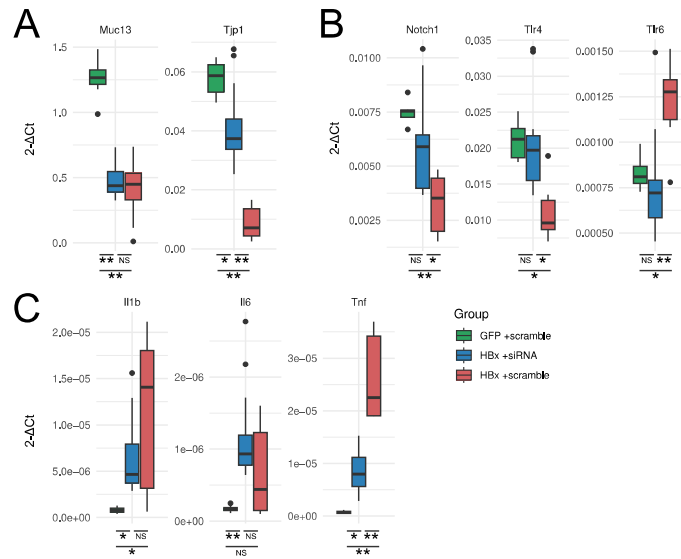

## Supplementary figure 11

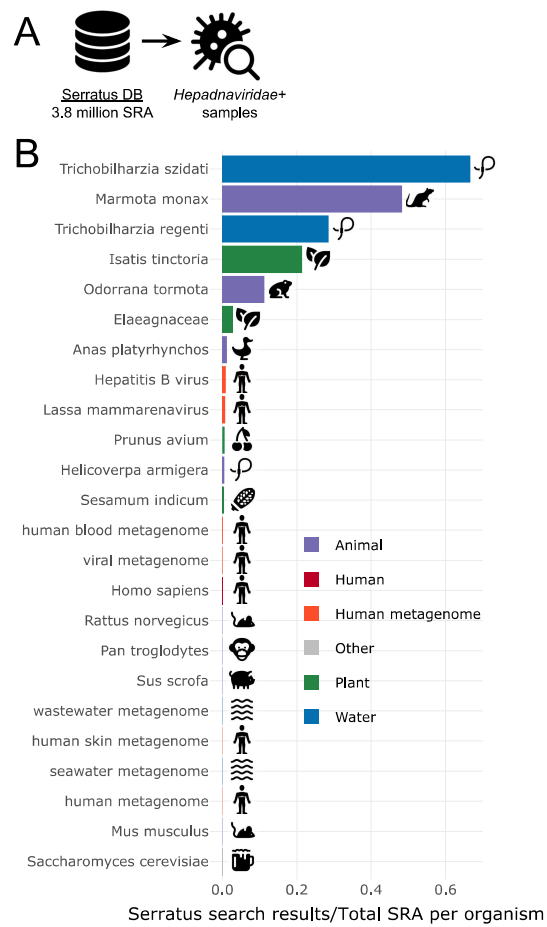

## Supplementary figure 12

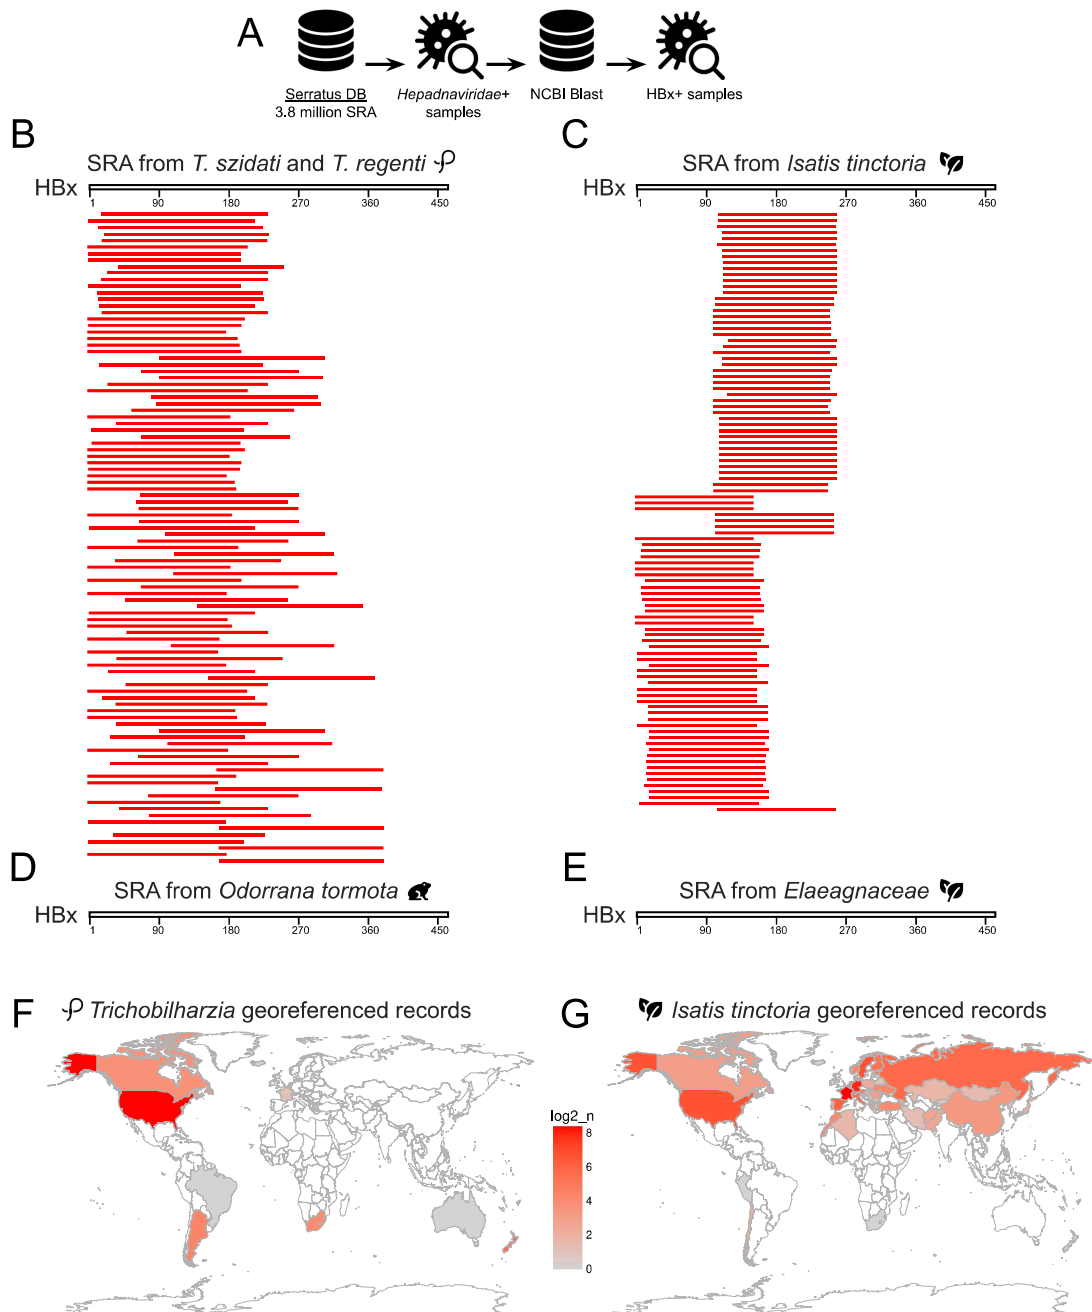

## Supplementary figure 13

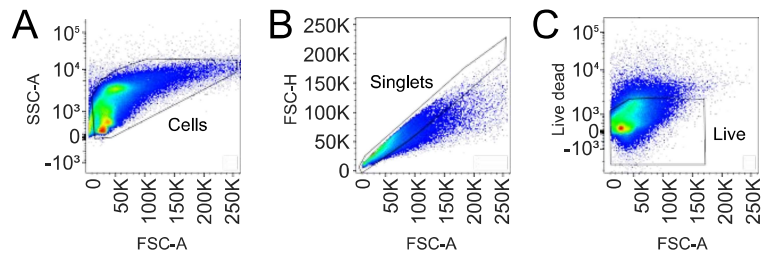

Supplement: inline-supplementary-material-2 [file inline-supplementary-material-2.pdf]
